# Supplementary material for: The SZT2 Interactome Unravels New Functions of the KICSTOR Complex
Source: MDPI journal article supplement (doi:10.3390/cells10102711), 2021-10-09
Supplement: s1 [file s1]

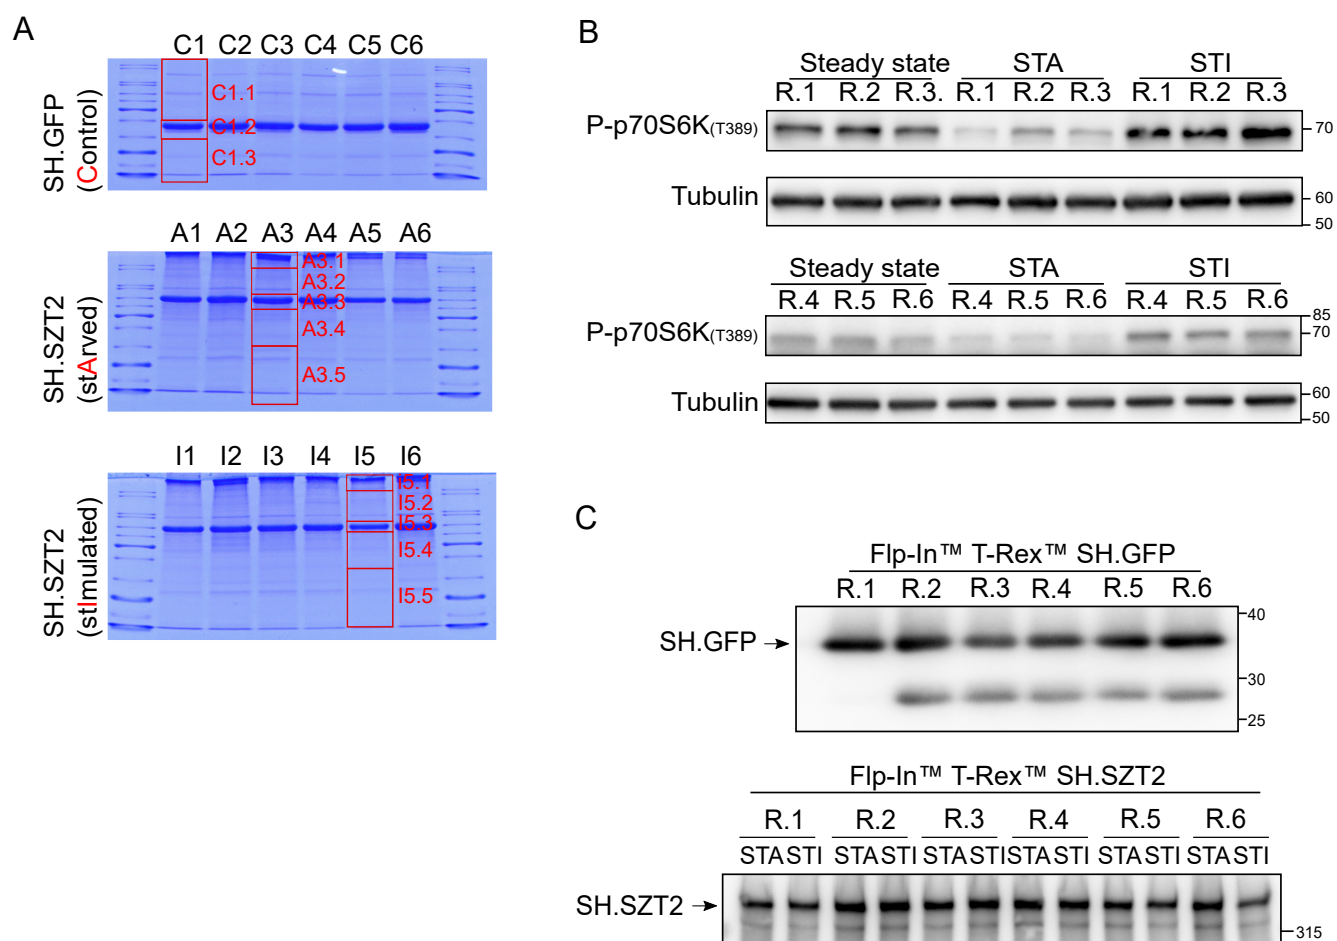

Figure S1

A

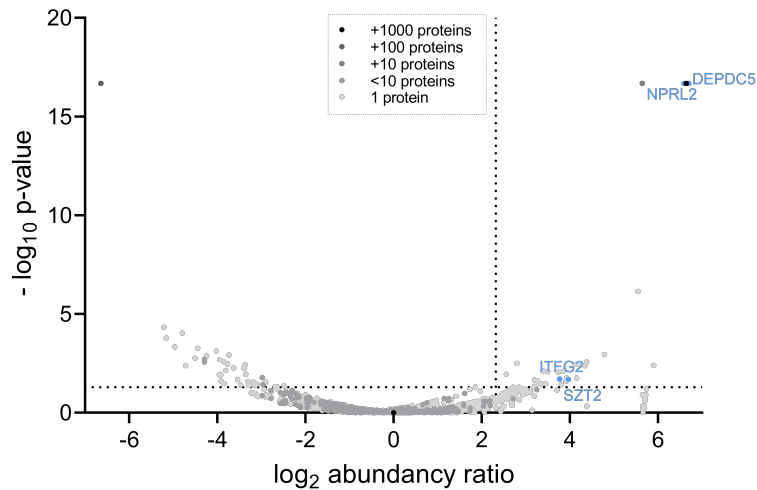

B

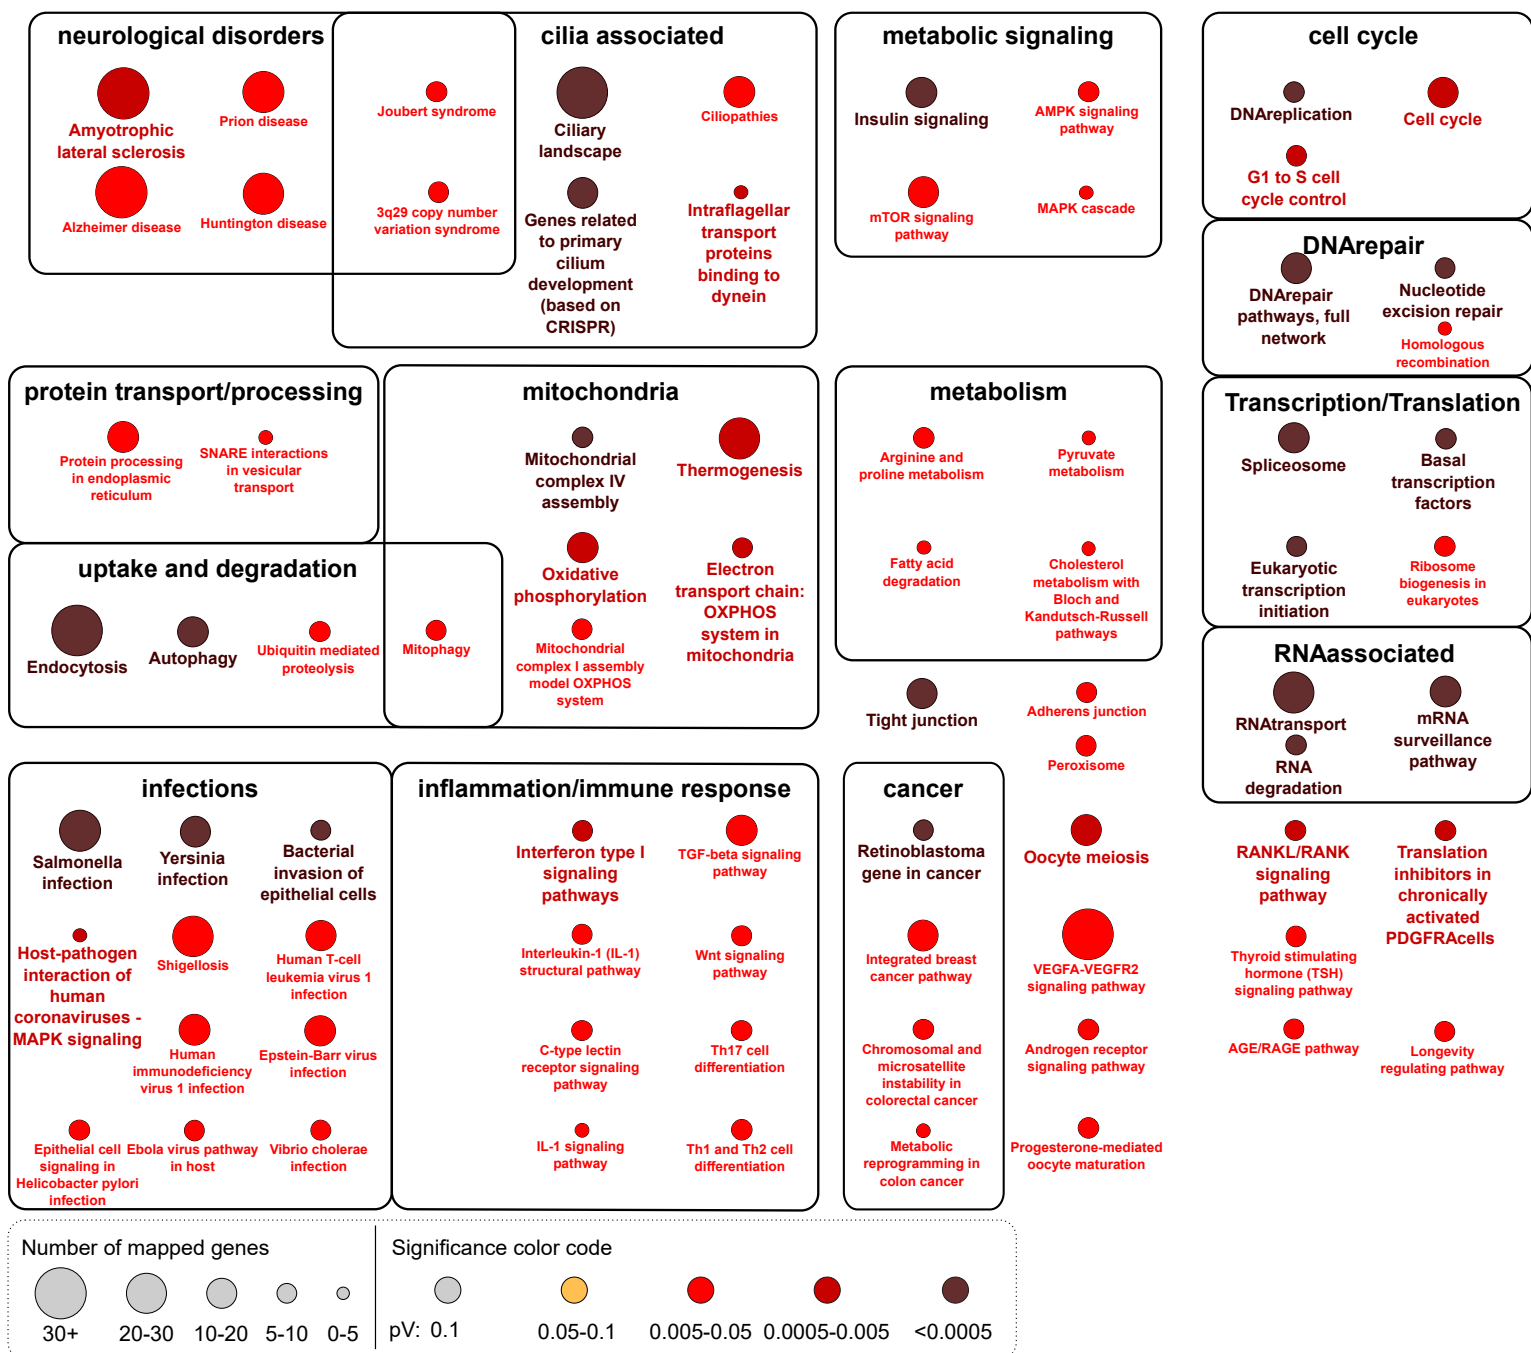

FIGURE S2

A

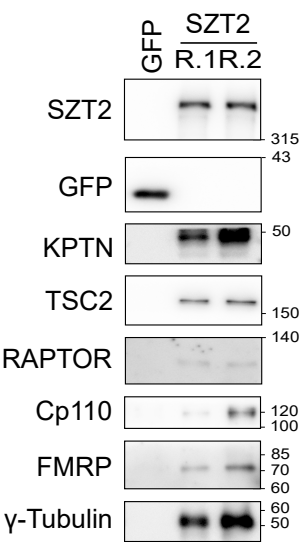

B

| Gene<br>Symbol | UniProt<br>P. access.nr. | Description                                                | STA vs. ctrl |           | STI vs. ctrl |           | STI vs. STA |          |
|----------------|--------------------------|------------------------------------------------------------|--------------|-----------|--------------|-----------|-------------|----------|
|                |                          |                                                            | ratio        | p-value   | ratio        | -p-value  | ratio       | p- value |
| FMR1           | Q06787                   | Synaptic functional regulator FMR1                         | 100          | 2.063E-17 | 100          | 2.080E-17 | 0.68        | 0.67     |
| NUFIP1         | Q9UHK0                   | Nuclear fragile X mental retardation-interacting protein 1 | 100          | 2.063E-17 | 100          | 2.080E-17 | n.a.        | n.a.     |
| BNIP1          | Q12981                   | Vesicle transport protein SEC20                            | 0.01         | 2.063E-17 | 93.62        | 7.18E-07  | 100         | 3.45E-17 |
| TEX264         | Q9Y6I9                   | Testis-expressed protein 264                               | 100          | 2.063E-17 | 100          | 2.080E-17 | 0.98        | 0.93     |
| PEX14          | O75381                   | Peroxisomal membrane protein PEX14                         | 100          | 2.063E-17 | 100          | 2.080E-17 | 0.89        | 0.99     |
| USP14          | P54578                   | Ubiquitin carboxyl-terminal hydrolase 14                   | n.a.         | n.a.      | 100          | 2.080E-17 | 100         | 3.45E-17 |
| LGALS3         | P17931                   | Galectin-3                                                 | 100          | 2.06E-17  | 100          | 2.080E-17 | 1.35        | 0.37     |
| SNAP29         | O95721                   | Synaptosomal-associated protein 29                         | n.a.         | n.a.      | 100          | 2.080E-17 | 100         | 3.45E-17 |

FIGURE S3

Genotyping

A

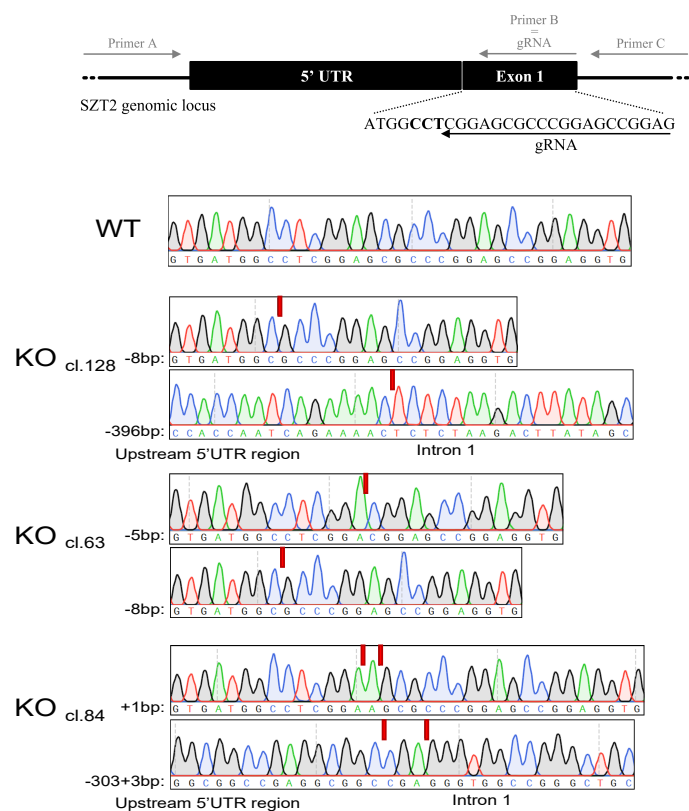

FIGURE S4



## Amino acids and FBS sensing

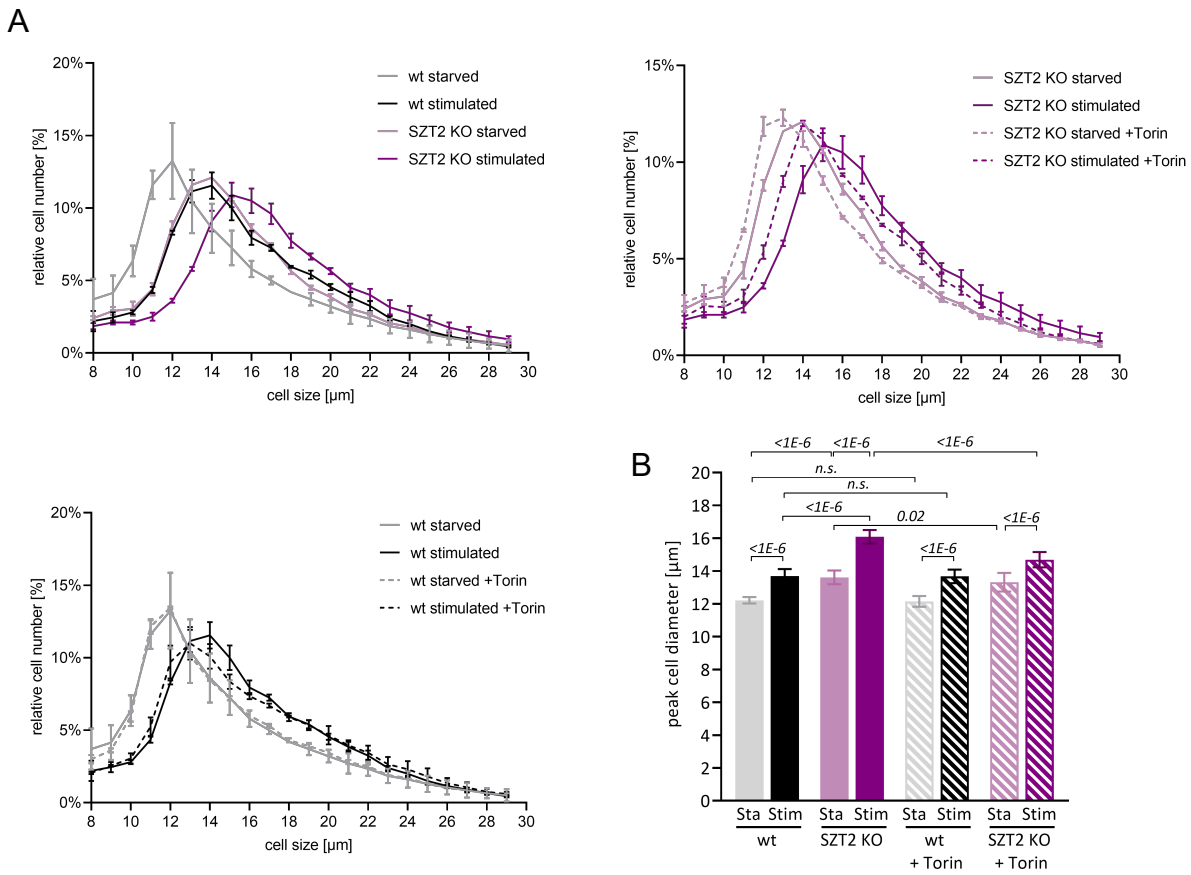

FIGURE S5

A

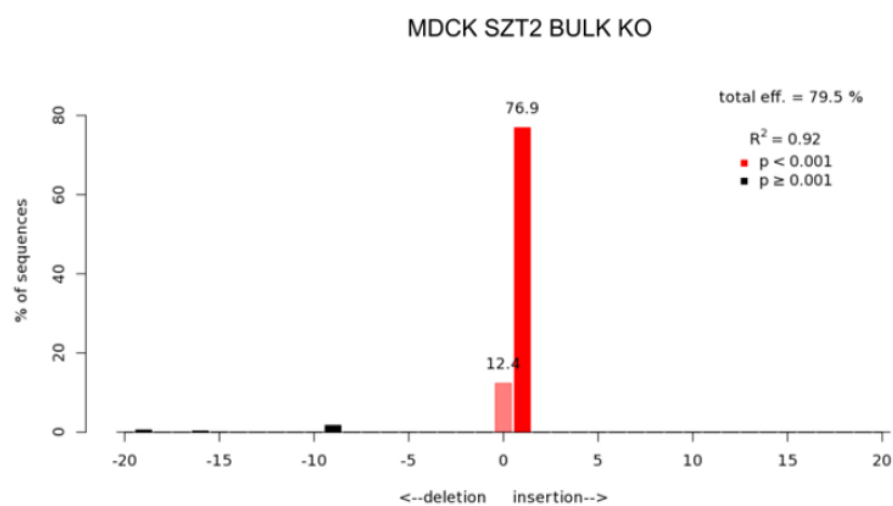

B

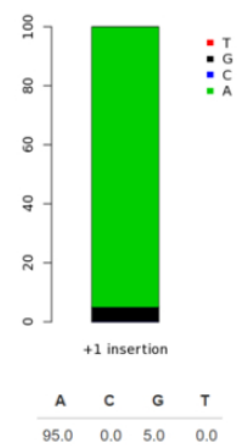

FIGURE S6
